# Supplementary material
Source: PubMed Central journal article supplement (PMC5607460)
Supplement: la7b00696_si_001.pdf [file la7b00696_si_001.pdf]

## Supporting Information

For

# Competition between Hydrogen Evolution and Carbon Dioxide Reduction on Copper Electrodes in Mildly Acidic Media

*Hideshi Ooka,<sup>1,2</sup> Marta C. Figueiredo,<sup>3</sup> Marc T.M. Koper<sup>3\*</sup>*

1 Department of Applied Chemistry, The University of Tokyo, 7-3-1, Hongo, Bunkyo-ku, Tokyo, 113-8656, Japan

2 Center for Sustainable Resource Science, RIKEN, 2-1, Hirosawa, Wako, Saitama, 351-0198, Japan

3 Leiden Institute of Chemistry, Leiden University, 2300 RA, Leiden, The Netherlands

### Corresponding Author

\*m.koper@lic.leidenuniv.nl

Figure S1: FTIR spectra of the copper electrode showing the wavenumber region for bicarbonate.

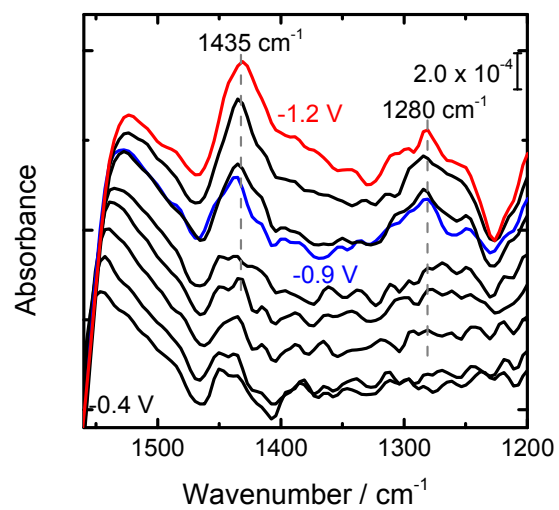

**Figure S1.** FTIR spectra showing the region for bicarbonate/carbonate vibrations. The spectra were recorded in the same experiment of Figure 4.
